# Supplementary material for: A bimetallic (Ni/Co) metal–organic framework with excellent oxidase-like activity for colorimetric sensing of ascorbic acid
Source: Royal Society of Chemistry journal article supplement (doi:10.1039/d2ay01927b), 2023-01-01
Supplement: d2ay01927b1.pdf [file d2ay01927b1.pdf]

**Electronic Supplementary material**

**Bimetallic (Ni/Co) metal-organic framework with excellent  
oxidase-like activity for colorimetric sensing of ascorbic acid**

Jing Wan, Jian-Mei Zou\*, Shu-Jing Zhou, Feng-Lan Pan, Fei Hua, Yu-Lan Zhang, Jin-Fang Nie, Yun Zhang\*

Guangxi Key Laboratory of Electrochemical and Magnetochemical  
Function Materials, College of Chemistry and Bioengineering, Guilin  
University of Technology, Guilin 541004, P. R. China

\*Corresponding author. E-mail address: 2019136@glut.edu.cn (Jianmei  
Zou), zy@glut.edu.cn (Yun Zhang).

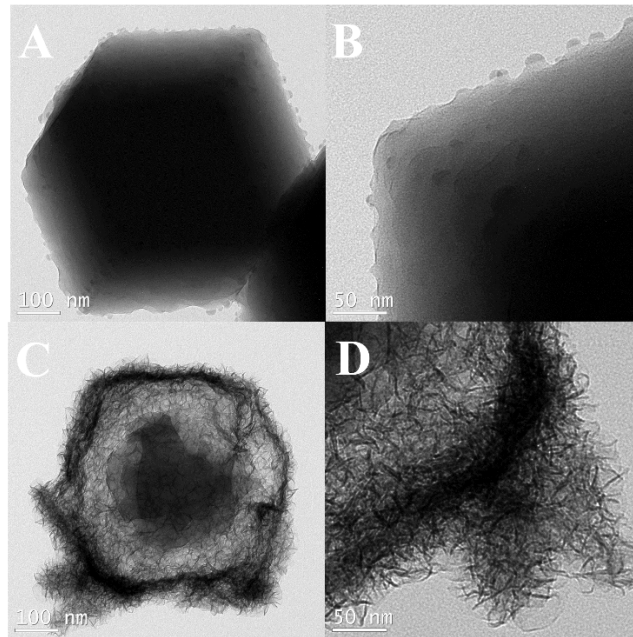

**Fig. S1** TEM images of ZIF-67 (A and B) and Ni/Co-MOF (C and D) under different magnifications.

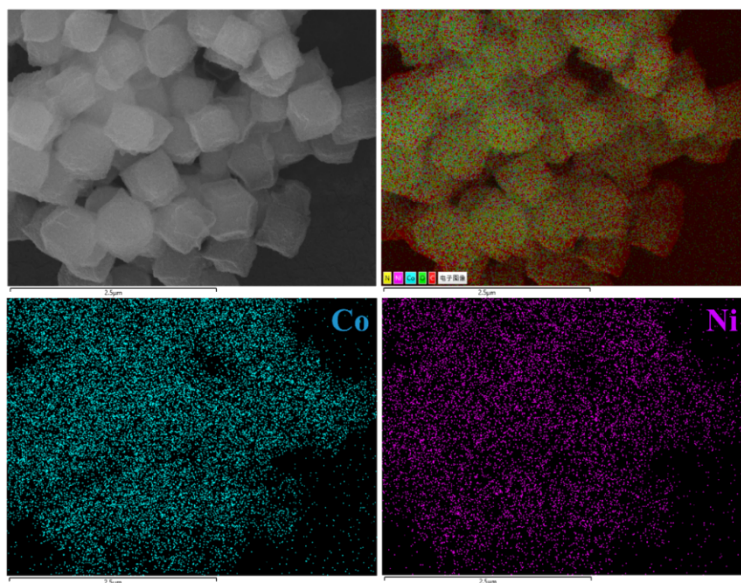

**Fig. S2** EDS mappings of Ni/Co-MOF.

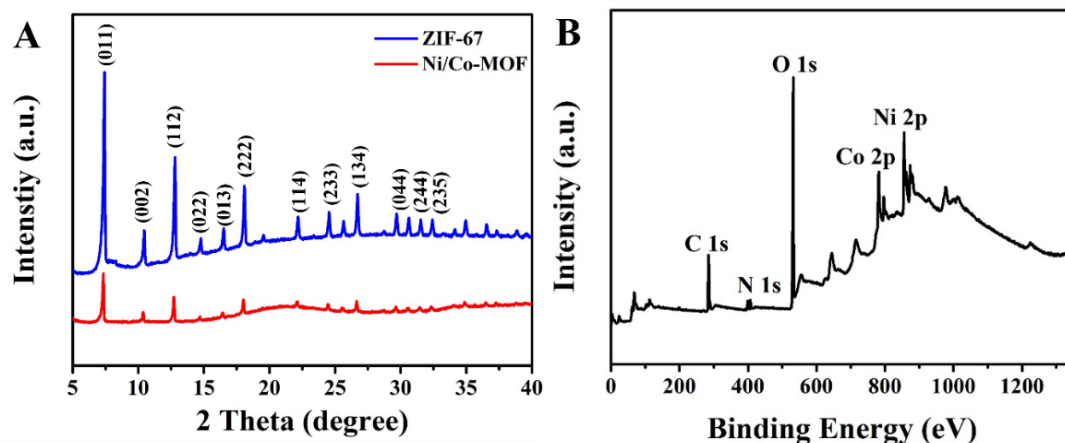

**Fig. S3** (A) XRD patterns of ZIF-67 and Ni/Co-MOF. (B) XPS survey spectrum of Ni/Co-MOF.

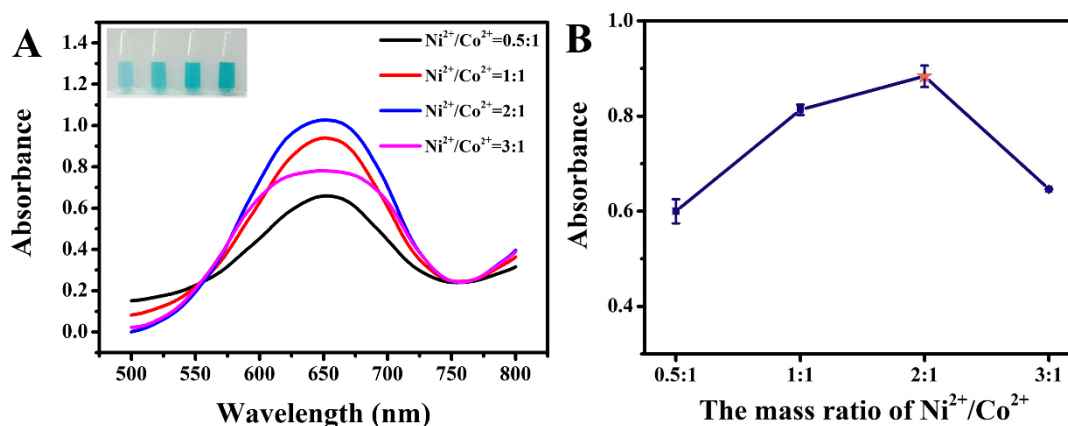

**Fig. S4** Effect of the  $\text{Ni}^{2+}:\text{Co}^{2+}$  mass ratio on the catalytic activity of Ni/Co-MOF. Reaction conditions: 400  $\mu\text{M}$  TMB, 400  $\mu\text{g mL}^{-1}$  Ni/Co-MOF, 0.2 mM NaAc-HAc buffer (pH 4.0), 15 min, 25  $^{\circ}\text{C}$ . (A) UV-vis absorption spectra and visual color changes of TMB in the reaction systems with various catalysts. (B) Corresponding line chart of (A). The error bars represent the standard deviations for three repeated experiments.

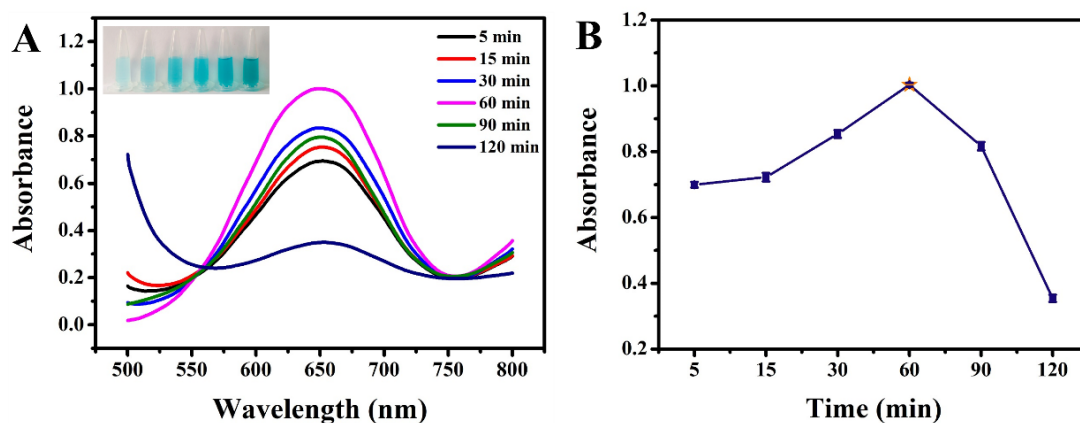

**Fig. S5** Effects of synthesis time on the catalytic activity of Ni/Co-MOF. (A) UV-vis absorption spectra and visual color changes of TMB in the reaction systems containing Ni/Co-MOF synthesized over 5, 15, 30, 60, 90, and 120 min. (B) Corresponding line chart of (A). The error bars represent the standard deviations for three repeated experiments.

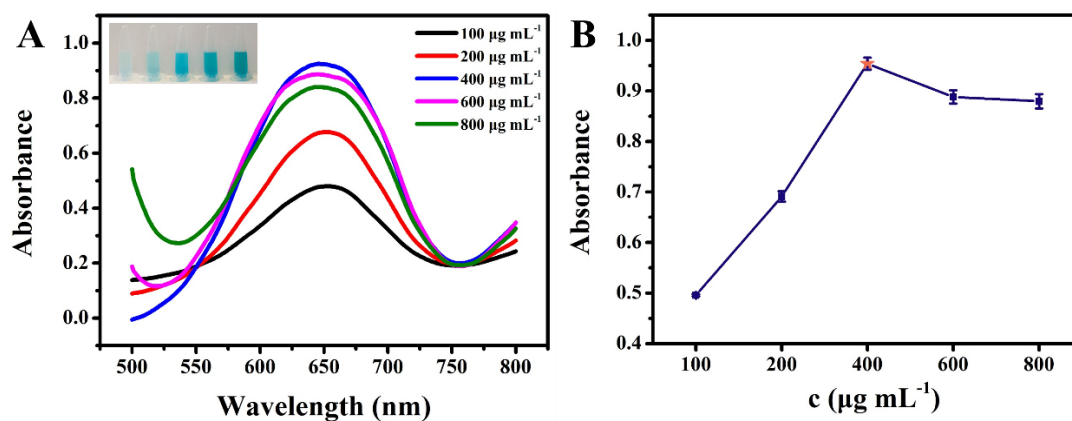

**Fig. S6** (A) UV-vis absorption spectra and visual color changes of TMB in reaction systems containing 100, 200, 400, 600, and 800 µg mL<sup>-1</sup> Ni/Co-MOF. (B) Corresponding line chart of (A). Reaction conditions: pH 4.0, reaction time 15 min, temperature 25 °C, and TMB concentration 400 µM, unless otherwise stated.

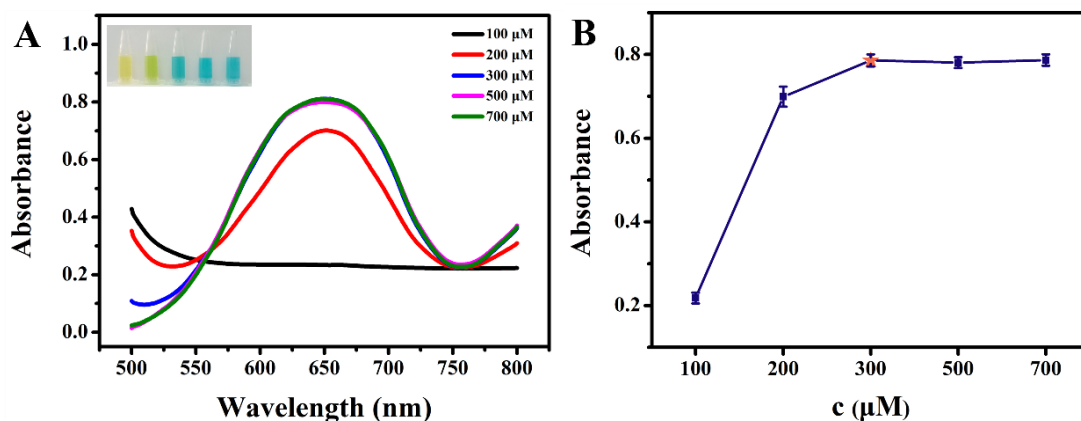

**Fig. S7** (A) UV-vis absorption spectra and visual color changes of TMB in reaction systems containing 100, 200, 300, 500, and 700  $\mu\text{M}$  TMB. (B) Corresponding line chart of (A). Reaction conditions: Ni/Co-MOF concentration  $400 \mu\text{g mL}^{-1}$ , pH 4.0, reaction time 15 min, and temperature  $25 \text{ }^\circ\text{C}$ , unless otherwise stated.

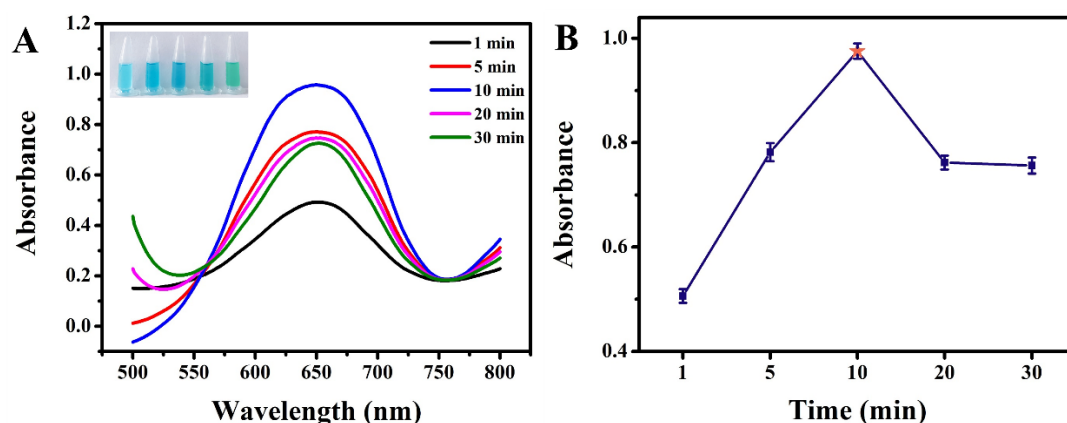

**Fig. S8** (A) UV-vis absorption spectra and visual color changes of TMB after 1, 5, 10, 20, and 30 min of reaction. (B) Corresponding line chart of (A). Reaction conditions: Ni/Co-MOF concentration  $400 \mu\text{g mL}^{-1}$ , pH 4.0, temperature  $25 \text{ }^\circ\text{C}$ , and TMB concentration  $300 \mu\text{M}$ , unless otherwise stated.

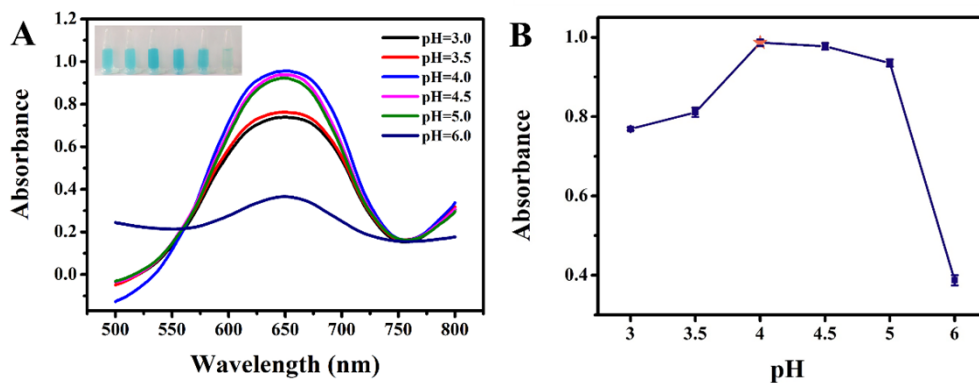

**Fig. S9** (A) UV-vis absorption spectra and visual color changes of TMB in reaction systems with pH 3, 3.5, 4, 4.5, 5, and 6. (B) Corresponding line chart of (A). Reaction conditions: Ni/Co-MOF concentration  $400 \mu\text{g mL}^{-1}$ , reaction time 10 min, temperature  $25^\circ\text{C}$ , and TMB concentration  $300 \mu\text{M}$ , unless otherwise stated.

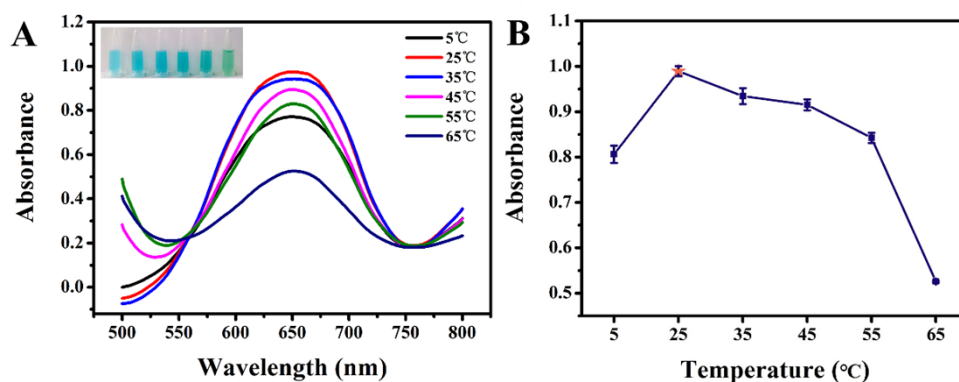

**Fig. S10** (A) UV-vis absorption spectra and visual color changes of TMB in reaction systems at  $5^\circ\text{C}$ ,  $25^\circ\text{C}$ ,  $35^\circ\text{C}$ ,  $45^\circ\text{C}$ ,  $55^\circ\text{C}$ , and  $65^\circ\text{C}$ . (B) Corresponding line chart of (A). Reaction conditions: Ni/Co-MOF concentration  $400 \mu\text{g mL}^{-1}$ , pH 4.0, reaction time 10 min, and TMB concentration  $300 \mu\text{M}$ , unless otherwise stated.

**Table S1.** The kinetic parameters of different catalysts

| Nanomaterials | $K_m$ (mM) | $V_{max}$ ( $10^{-8}$ M s $^{-1}$ ) | References |
|---------------|------------|-------------------------------------|------------|
| Ni-MOF        | 0.365      | 6.53                                | 1          |
| GOx@Fe-BTC    | 0.280      | 4.20                                | 2          |
| MIL-100 (Fe)  | 0.424      | 2.10                                | 3          |
| HRP           | 0.434      | 10.0                                | 4          |
| Ni/Co-MOF     | 0.255      | 1.35                                | This Work  |

**Table S2.** Comparison of different colorimetric methods used for AA detection

| Catalyst            | Linear rang<br>( $\mu$ M) | Detection limit<br>( $\mu$ M) | References |
|---------------------|---------------------------|-------------------------------|------------|
| Fe/Co NPs           | 0.5-28                    | 0.380                         | 5          |
| Fe-Mn bimetallic    | 8-56                      | 0.880                         | 6          |
| Cu-Ag/rGO           | 0.5-30                    | 3.600                         | 7          |
| Pt/CeO <sub>2</sub> | 0.5-30                    | 0.080                         | 8          |
| CuO/Pt              | 1-600                     | 0.796                         | 9          |
| Ni/Co-MOF           | 0.015-50                  | 0.004                         | This Work  |

**Table S3.** Detection of AA contents in human serum and fruit juice samples

| Sample      | Added<br>( $\mu$ M) | Total found<br>( $\mu$ M) | Recovery<br>(%) | RSD(%)<br>(n=3) |
|-------------|---------------------|---------------------------|-----------------|-----------------|
| Human serum | 0                   | 5.26                      | /               | 5.35            |
|             | 0.2                 | 5.44                      | 91.07           | 1.32            |
|             | 2                   | 7.14                      | 93.81           | 1.11            |
|             | 20                  | 25.30                     | 100.18          | 8.48            |
| Fruit juice | 0                   | 6.29                      | /               | 3.13            |
|             | 0.2                 | 6.48                      | 95.31           | 0.31            |
|             | 2                   | 8.37                      | 103.99          | 1.71            |
|             | 20                  | 26.60                     | 101.53          | 1.90            |

## References

- (1) J. Chen, Y. Shu, H. Li, Q. Xu and X. Hu, *Talanta*, 2018, **189**, 254-261.
- (2) Z. Zhao, J. Pang, W. Liu, T. Lin, F. Ye and S. Zhao, *Mikrochim. Acta.*, 2019, **186**, 295.
- (3) A. H. Valekar, B. S. Batule, M. I. Kim, K. H. Cho, D. Y. Hong, U. H. Lee, J. S. Chang, H. G. Park and Y. K. Hwang, *Biosens. Bioelectron.*, 2018, **100**, 161-168.
- (4) J. Yang, M. Cho and Y. Lee, *Biosens. Bioelectron.*, 2016, **75**, 15-22.
- (5) T. Wu, Z. Ma, P. Li, M. Liu, X. Liu, H. Li, Y. Zhang and S. Yao, *Talanta*, 2019, **202**, 354-361.

- (6) Y. Han, L. Luo, L. Zhang, Y. Kang, H. Sun, J. Dan, J. Sun, W. Zhang, T. Yue and J. Wang, *Lwt*, 2022, **154**.
- (7) G. Darabdhara, B. Sharma, M. R. Das, R. Boukherroub and S. Szunerits, *Sens. Actuators B Chem.*, 2017, **238**, 842-851.
- (8) X. Liu, X. Wang, C. Qi, Q. Han, W. Xiao, S. Cai, C. Wang and R. Yang, *Appl. Surf. Sci.*, 2019, **479**, 532-539.
- (9) X. Wang, Q. Han, S. Cai, T. Wang, C. Qi, R. Yang and C. Wang, *Analyst*, 2017, **142**, 2500-2506.
